# Supplementary material for: Ab initio studies of O 2 − (H 2 O) n and O 3 − (H 2 O) n anionic molecular clusters, n ≤12
Source: Copernicus journal article supplement (doi:10.5194/acp-11-7133-2011), 2011-07-21
Supplement: Supplementary file 1 [file acp-11-7133-2011-supplement.pdf]

## Supplementary information

Table 1: Thermodynamic values of Reactions (R3 - R7) for  $x=2$ , i.e. evaporation of neutral  $O_2$  from  $O_2^-(H_2O)_n$  clusters (in kJ/mol). Entropy is not included.

| n  | R3 (x=2) | R4 <sup>1</sup> | R5 <sup>2</sup> | R6 <sup>3</sup> | R7 <sup>4</sup> |
|----|----------|-----------------|-----------------|-----------------|-----------------|
| 1  | 136      | 92              | 44              | 0               | ~0              |
| 2  | 198      | 169             | 44              | -13             | -2              |
| 3  | 248      | 235             | 44              | -35             | 5               |
| 4  | 287      | 295             | 44              | -64             | 12              |
| 5  | 299      | 353             | 44              | -100            | 2               |
| 6  | 308      | 407             | 44              | -138            | -4              |
| 7  | 319      | 450             | 44              | -170            | -5              |
| 8  | 353      | 518             | 44              | -211            | 2               |
| 9  | 384      | 572             | 44              | -237            | 5               |
| 10 | 398      | 619             | 44              | -272            | 7               |
| 11 | 407      | 666             | 44              | -299            | -4              |
| 12 | 432      | 714             | 44              | -326            | 1               |

Table 2: Thermodynamic values of Reactions (R3 - R7) for  $x=3$ , i.e. evaporation of neutral  $O_3$  from  $O_3^-(H_2O)_n$  clusters (in kJ/mol). Entropy is not included.

| n  | R3 (x=3) | R4 <sup>1</sup> | R5 <sup>2</sup> | R6 <sup>3</sup> | R7 <sup>4</sup> |
|----|----------|-----------------|-----------------|-----------------|-----------------|
| 1  | 281      | 78              | 203             | 0               | ~0              |
| 2  | 330      | 141             | 203             | -13             | -2              |
| 3  | 368      | 195             | 203             | -35             | 5               |
| 4  | 406      | 255             | 203             | -64             | 12              |
| 5  | 428      | 324             | 203             | -100            | 2               |
| 6  | 428      | 367             | 203             | -138            | -4              |
| 7  | 457      | 429             | 203             | -170            | -5              |
| 8  | 483      | 489             | 203             | -211            | 2               |
| 9  | 511      | 541             | 203             | -237            | 5               |
| 10 | 534      | 597             | 203             | -272            | 7               |
| 11 | 548      | 649             | 203             | -299            | -4              |
| 12 | 559      | 682             | 203             | -326            | 1               |

Footnotes:

1. Accumulated binding energies of  $O_x^-(H_2O)_n$  clusters (This study).
2. Electron affinities of  $O_2$  and  $O_3$  (Lide, 1997).
3. Accumulated binding energies of neutral water clusters (Lee et al. 2005)
4. Adiabatic electron affinities of neutral water clusters (Lee et al. 2003, 2005).
